# Supplementary material for: Tuning of olfactory cortex ventral tenia tecta neurons to distinct task elements of goal-directed behavior
Source: eLife journal article supplement (doi:10.7554/elife.57268), 2020-08-04
Supplement: supp [file elife-57268-supp-v1.zip]

Archive with 18 entries (18 files):
- elife_poa_e57268_Figure_2_figure_supplement_1.pdf
- elife_poa_e57268_Figure_2_figure_supplement_2.pdf
- elife_poa_e57268_Figure_2_figure_supplement_3.pdf
- elife_poa_e57268_Figure_2_figure_supplement_4.pdf
- elife_poa_e57268_Figure_3_figure_supplement_1.pdf
- elife_poa_e57268_Figure_3_figure_supplement_2.pdf
- elife_poa_e57268_Figure_3_figure_supplement_3.pdf
- elife_poa_e57268_Figure_3_figure_supplement_4.pdf
- elife_poa_e57268_Figure_4_figure_supplement_1.pdf
- elife_poa_e57268_Figure_4_figure_supplement_2.pdf
- elife_poa_e57268_Figure_4_figure_supplement_3.pdf
- elife_poa_e57268_Figure_4_figure_supplement_4.pdf
- elife_poa_e57268_Figure_2_source_data_file_1.zip
- elife_poa_e57268_Figure_5_source_data_file_1.zip
- elife_poa_e57268_Figure_3_source_data_file_1.zip
- elife_poa_e57268_Figure_6_source_data_file_1.xlsx
- elife_poa_e57268_Figure_6_source_data_file_2.xlsx
- elife_poa_e57268_Transparent_Reporting_File.pdf
