# Supplementary material for: Tuning of olfactory cortex ventral tenia tecta neurons to distinct task elements of goal-directed behavior
Source: eLife journal article supplement (doi:10.7554/elife.57268), 2020-08-04
Supplement: supp [file elife-57268-supp-v1.zip › elife_poa_e57268_Figure_2_figure_supplement_2.pdf]

A

Window size = 20 msec (20msec step)

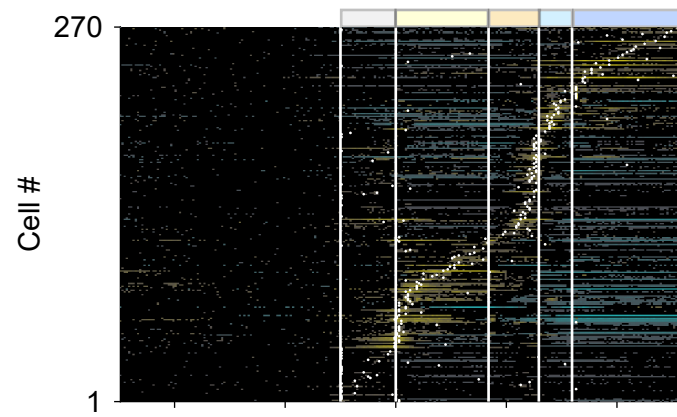

B

Window size = 50 msec (20msec step)

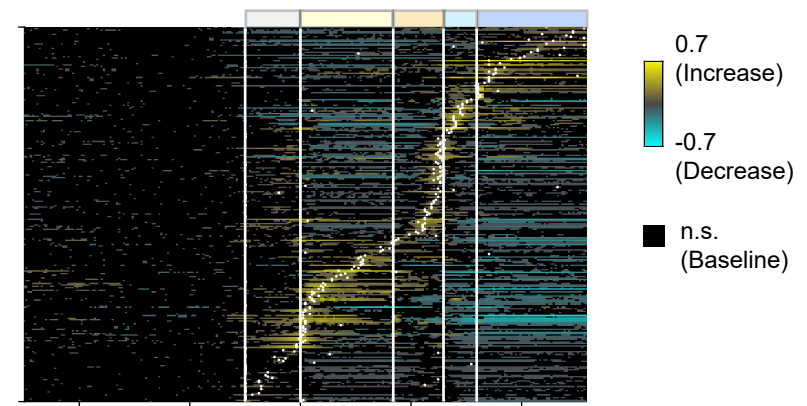

C

Window size = 100 msec (20msec step)

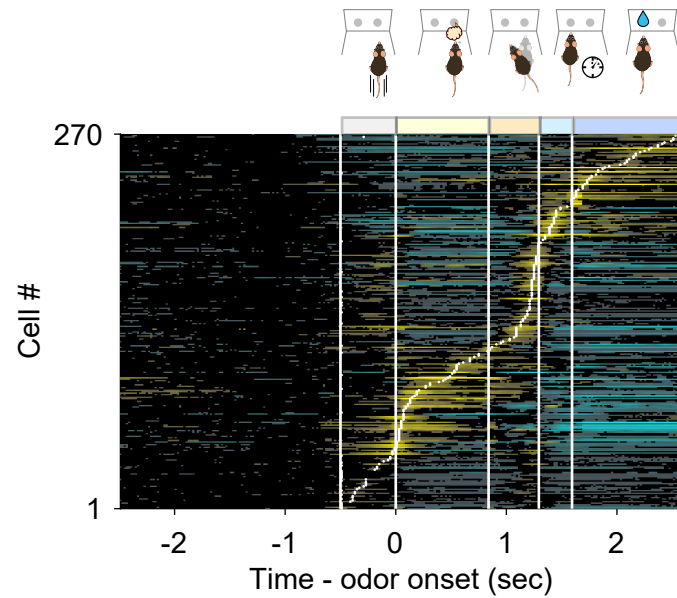

D

Window size = 200 msec (20msec step)

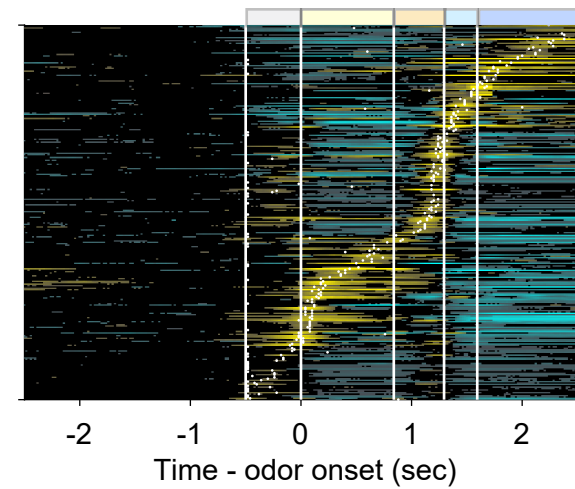

**Figure 2—figure supplement 2**
