# Supplementary material for: Tuning of olfactory cortex ventral tenia tecta neurons to distinct task elements of goal-directed behavior
Source: eLife journal article supplement (doi:10.7554/elife.57268), 2020-08-04
Supplement: supp [file elife-57268-supp-v1.zip › elife_poa_e57268_Figure_6_source_data_file_1.xlsx]

## Sheet: Sheet1
BX-VTT-NTg-VGLuT1-GAD-mRNAs
	mouse ID	# of VGluT1(+) cells		# of GAD65/67(+) cells
	180222B	85		7
	180223A	88		8
	180223B	86		9
