# Supplementary material for: Tuning of olfactory cortex ventral tenia tecta neurons to distinct task elements of goal-directed behavior
Source: eLife journal article supplement (doi:10.7554/elife.57268), 2020-08-04
Supplement: supp [file elife-57268-supp-v1.zip › elife_poa_e57268_Figure_6_source_data_file_2.xlsx]

## Sheet: Sheet1
Figure 6D
	to vTT	density
	mPFC	OB	AON	APC	PPC
1	150.153	1024.39	54.9994	1442.62	1201.88
2	426.133	1063.04	49.4674	1666.51	1425.03
3	303.379	1264.93	32.88	1501.67	1574.55
Figure 6F
	from vTT	density
	mPFC	OB	AON	OT	APC	PPC
1	34.4203	1482.7	1875	121.495	979.206	137.255
2	25.3165	1222.41	1781.25	280.731	378.457	109.299
3	13.4048	1169.1	2095.81	62.0301	522.954	53.6044
4				36.7505	1275.97
5				110.721
