# Supplementary figures and images for: Tuning of olfactory cortex ventral tenia tecta neurons to distinct task elements of goal-directed behavior
Source: eLife journal article supplement (doi:10.7554/elife.57268), 2020-08-04

A

Raw spike data

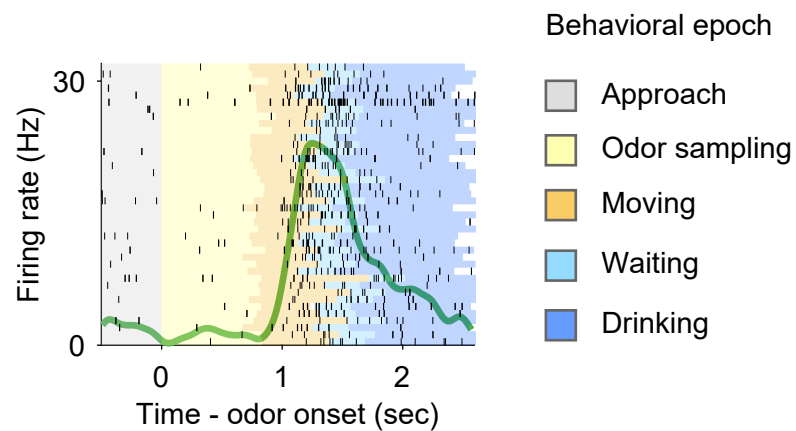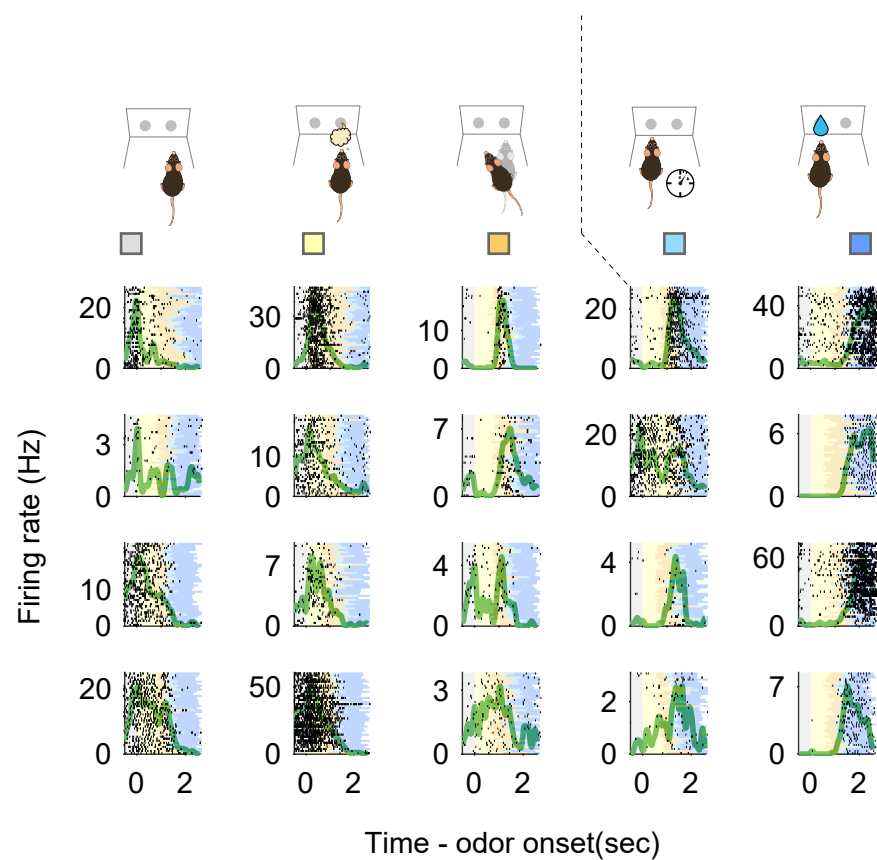

B

Event-Aligned spike data

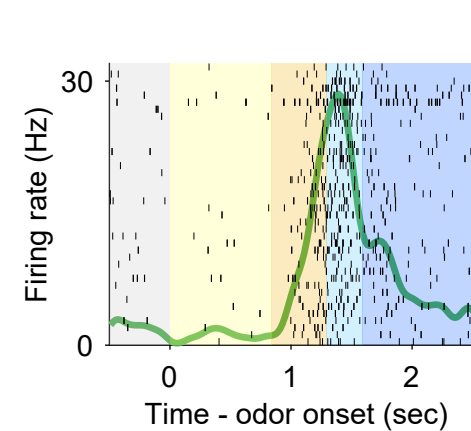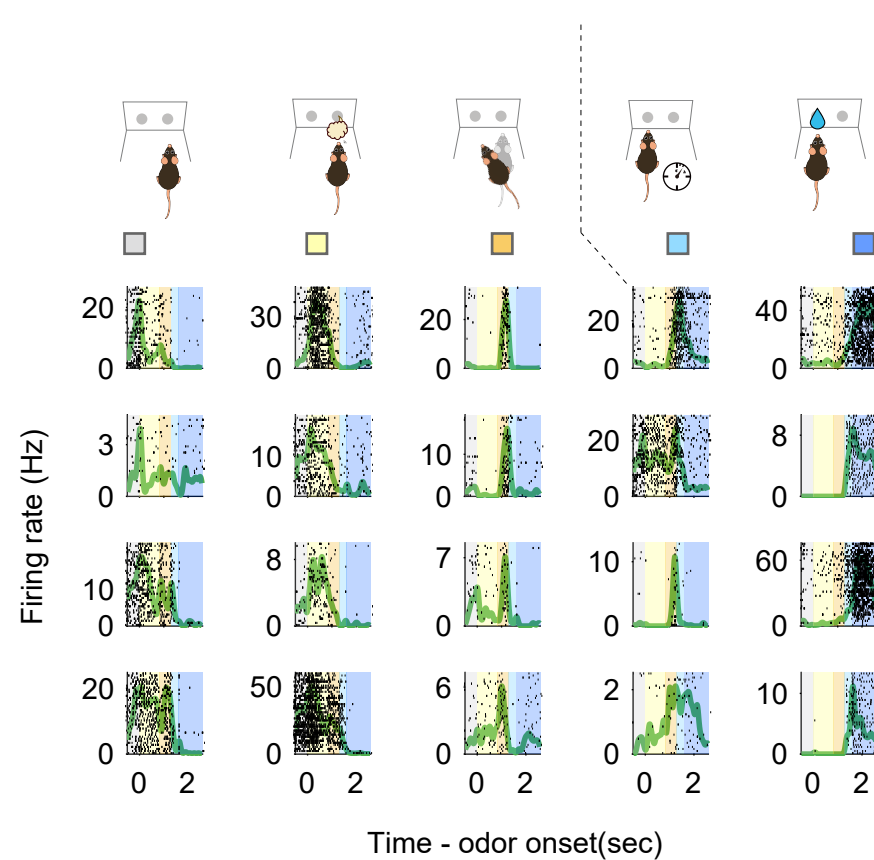

**Figure 2—figure supplement 1**

Supplement: supp [file elife-57268-supp-v1.zip › elife_poa_e57268_Figure_2_figure_supplement_1.pdf]

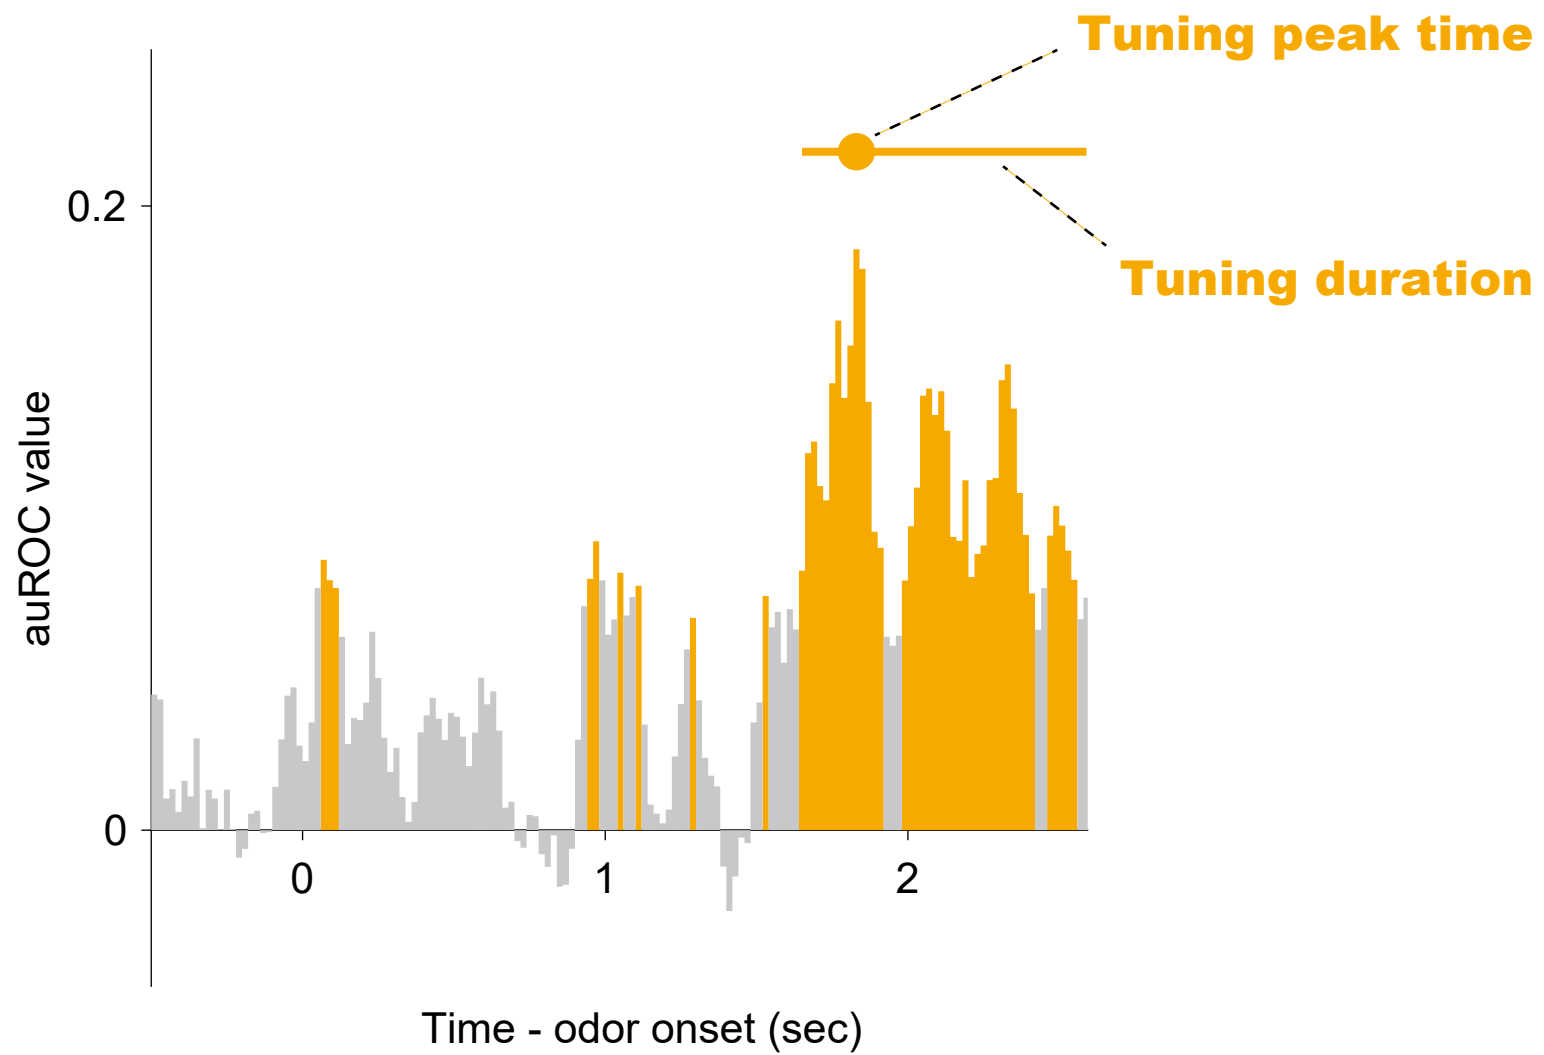

**Figure 2—figure supplement 3**

Supplement: supp [file elife-57268-supp-v1.zip › elife_poa_e57268_Figure_2_figure_supplement_3.pdf]

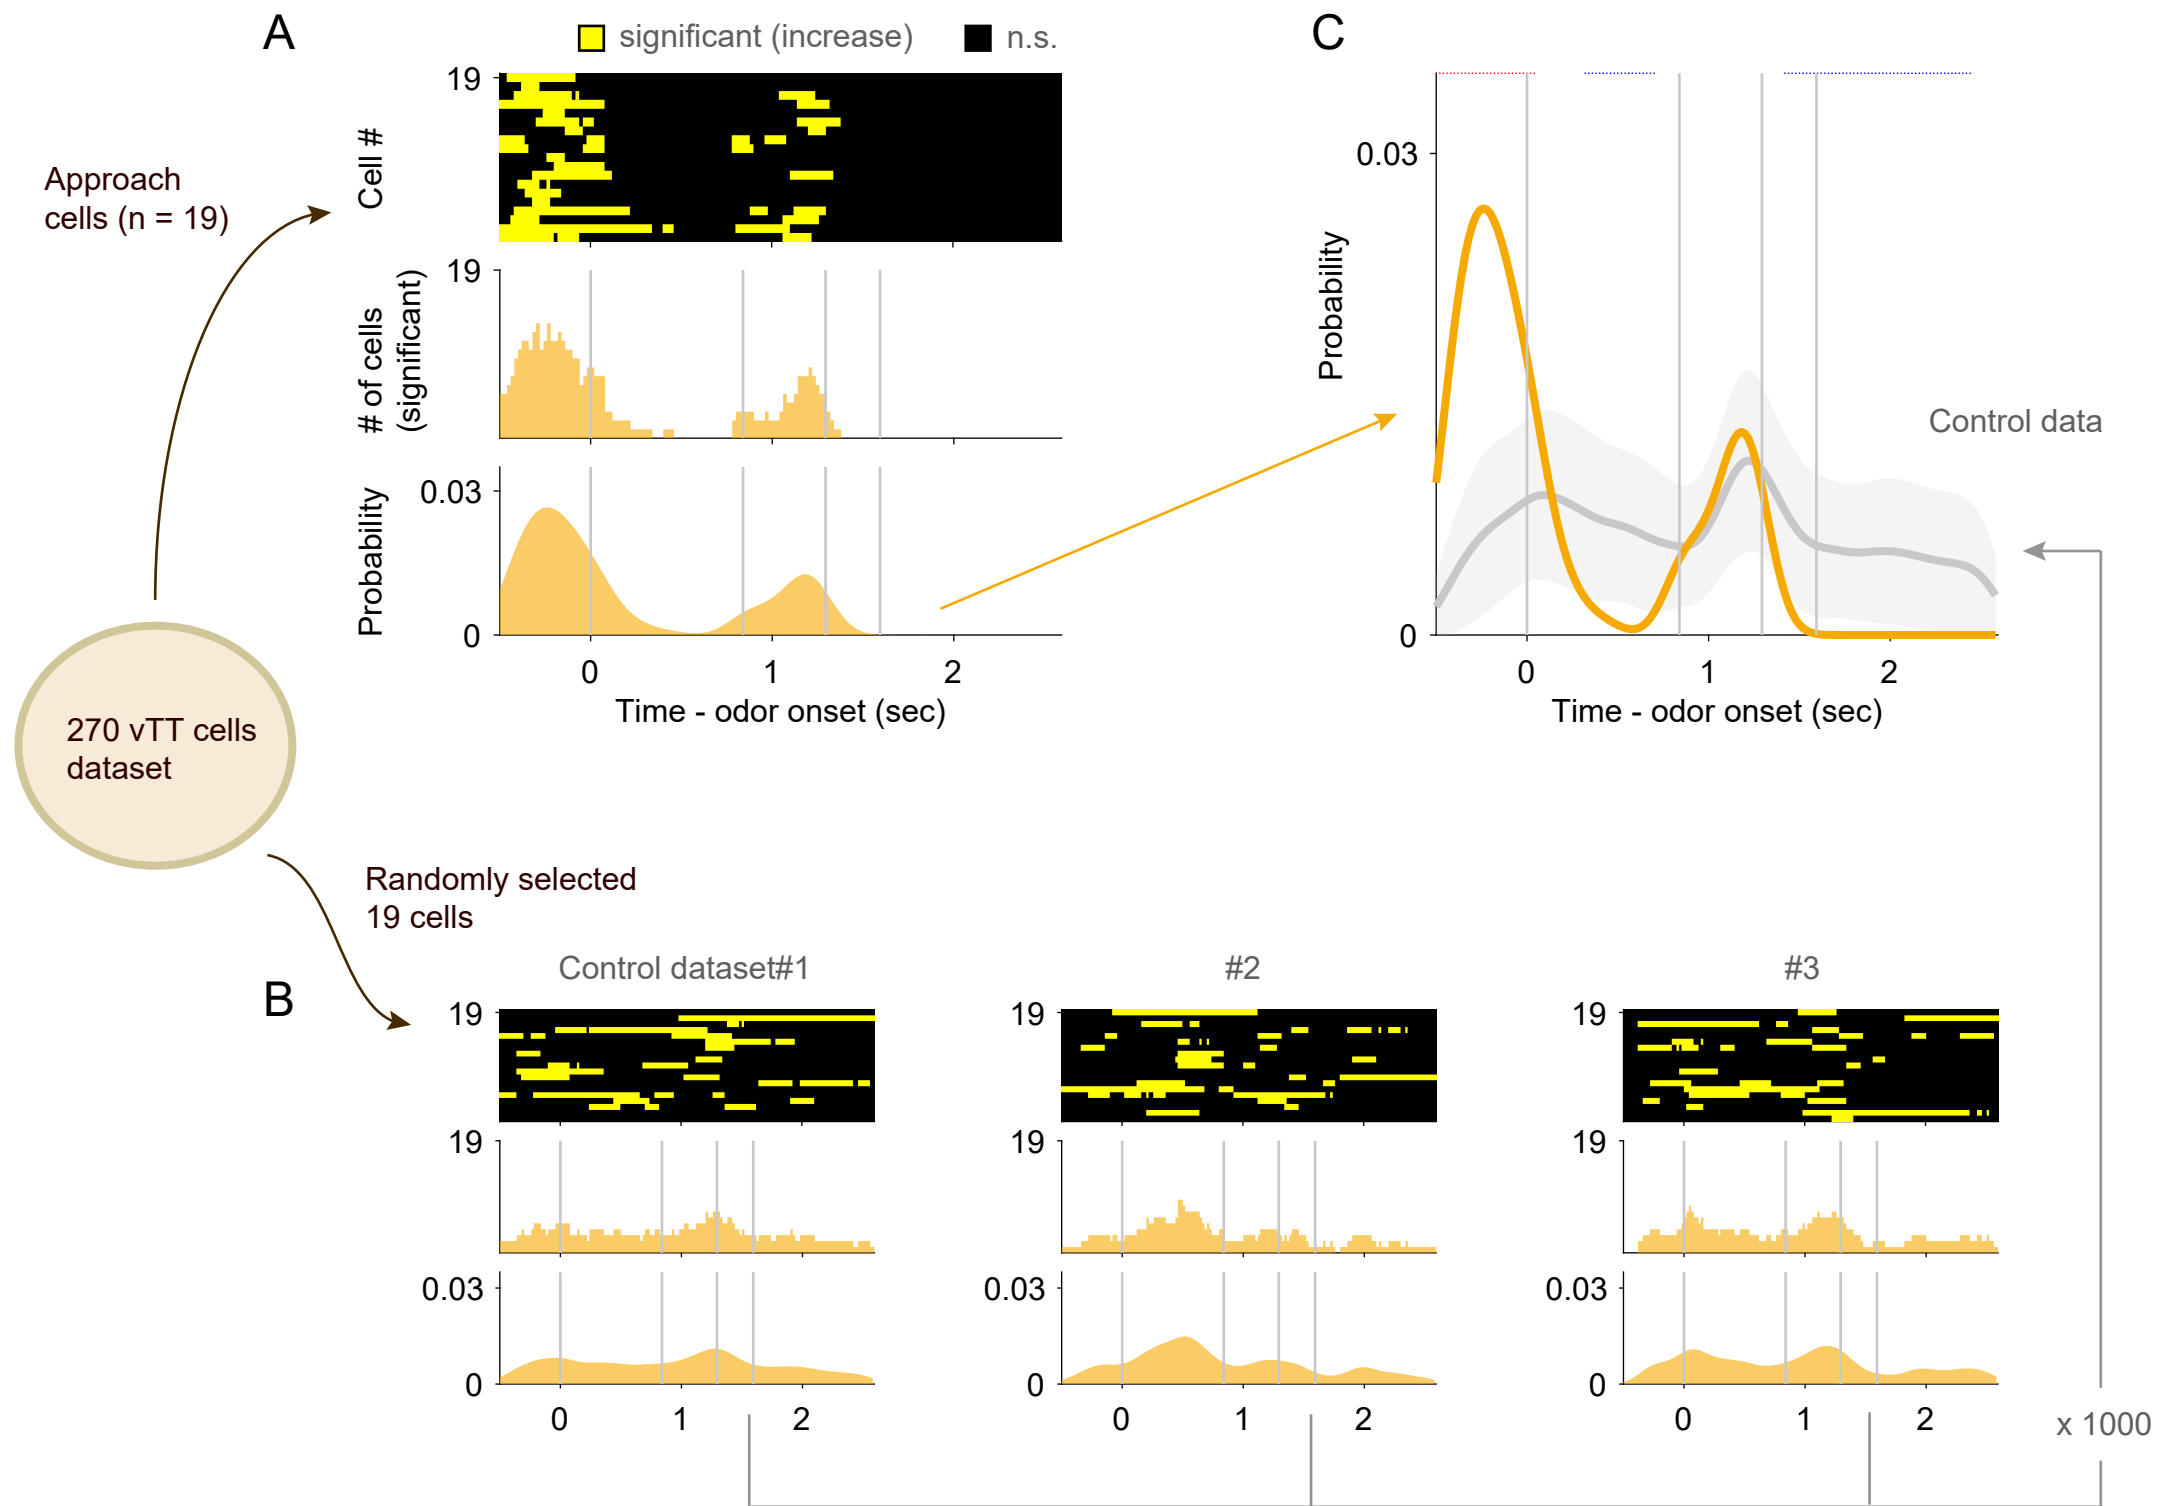

**Figure 2—figure supplement 4**

Supplement: supp [file elife-57268-supp-v1.zip › elife_poa_e57268_Figure_2_figure_supplement_4.pdf]

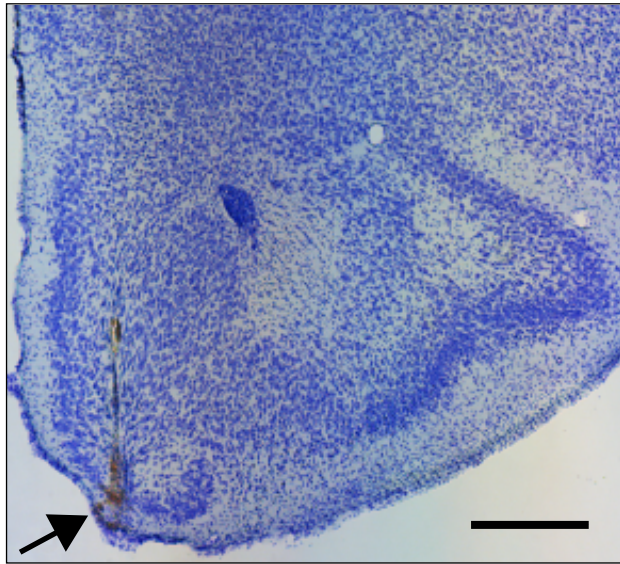

n = 6 mice

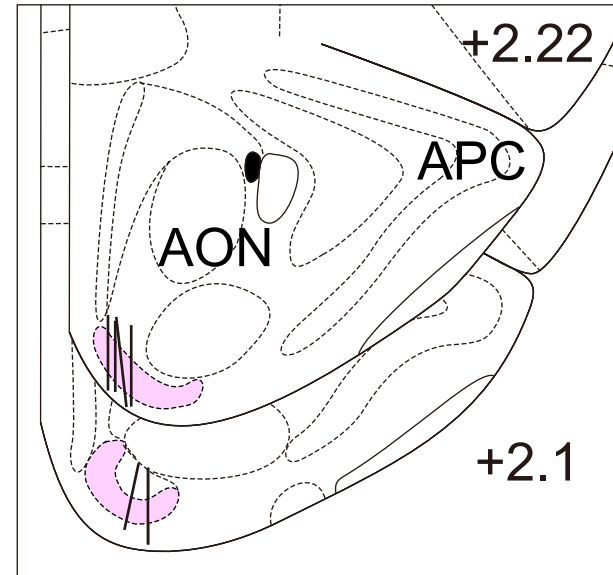

***Figure 3—figure supplement 1***

Supplement: supp [file elife-57268-supp-v1.zip › elife_poa_e57268_Figure_3_figure_supplement_1.pdf]

A

Raw spike data

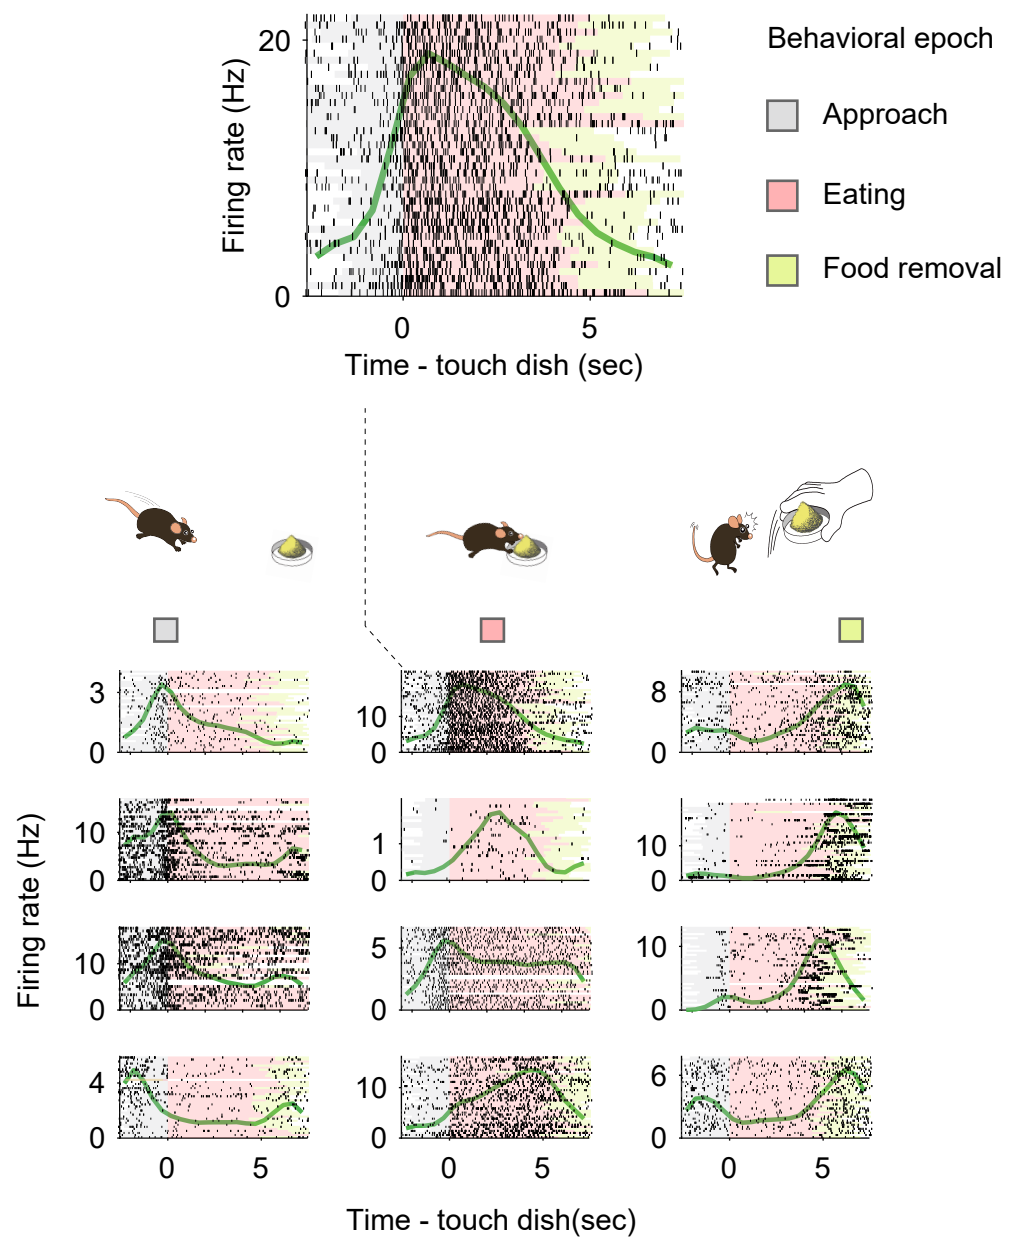

B

Event-Aligned spike data

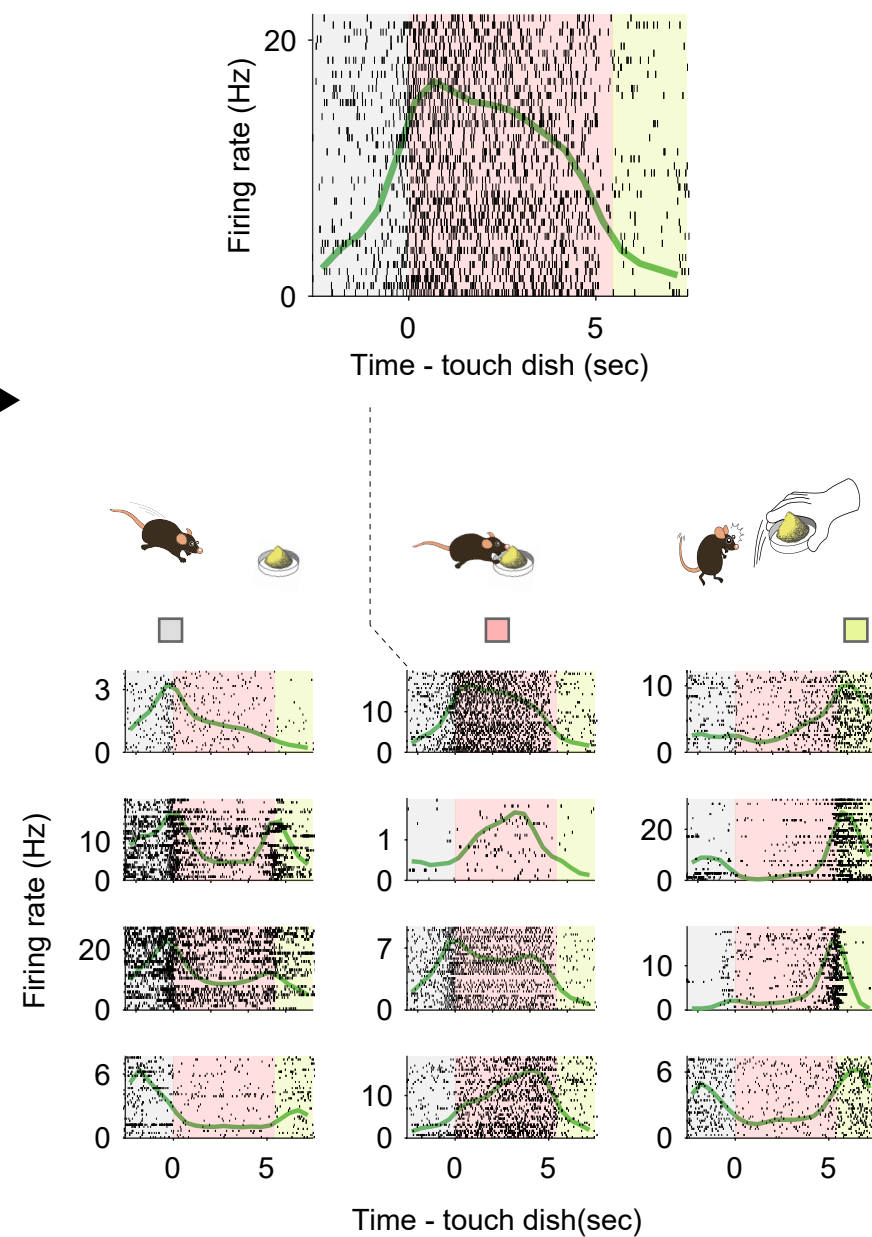

**Figure 3—figure supplement 2**

Supplement: supp [file elife-57268-supp-v1.zip › elife_poa_e57268_Figure_3_figure_supplement_2.pdf]

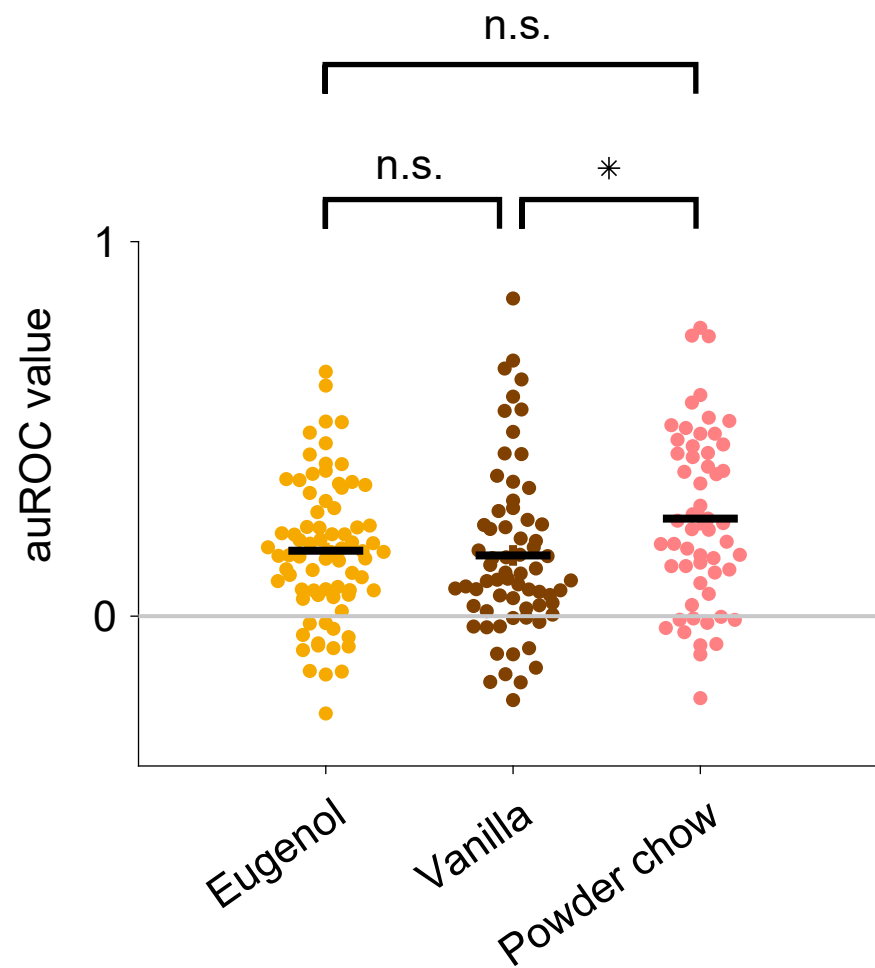

**Figure 3—figure supplement 4**

Supplement: supp [file elife-57268-supp-v1.zip › elife_poa_e57268_Figure_3_figure_supplement_4.pdf]

A

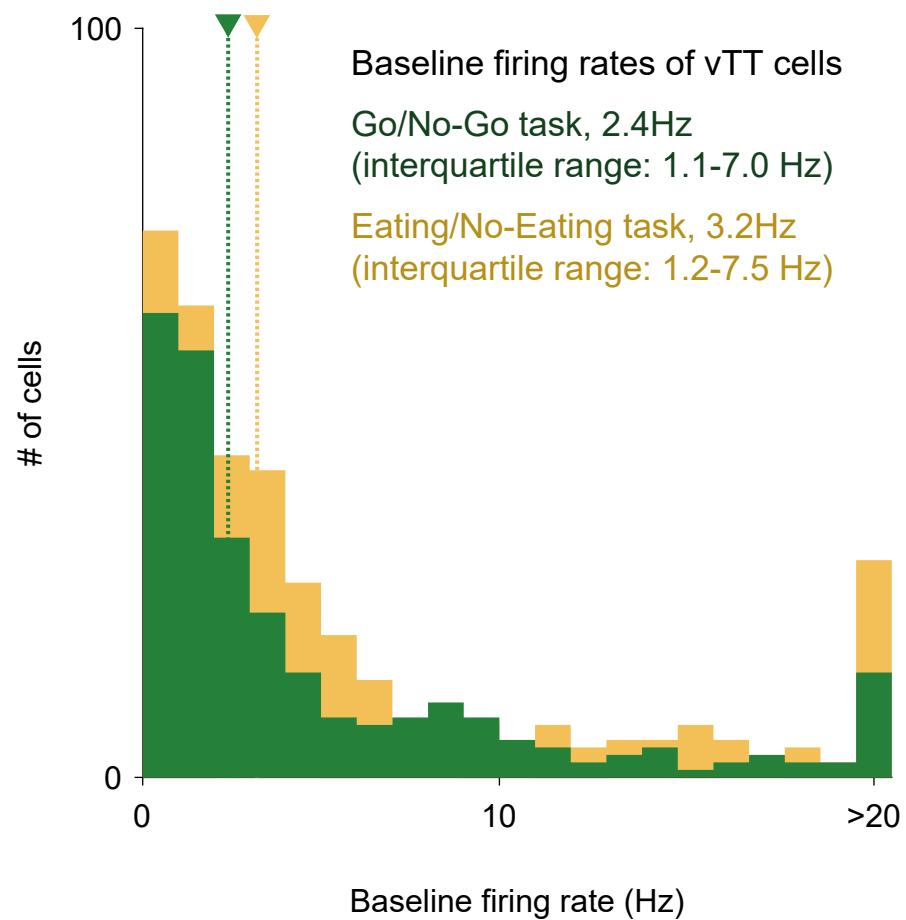

B

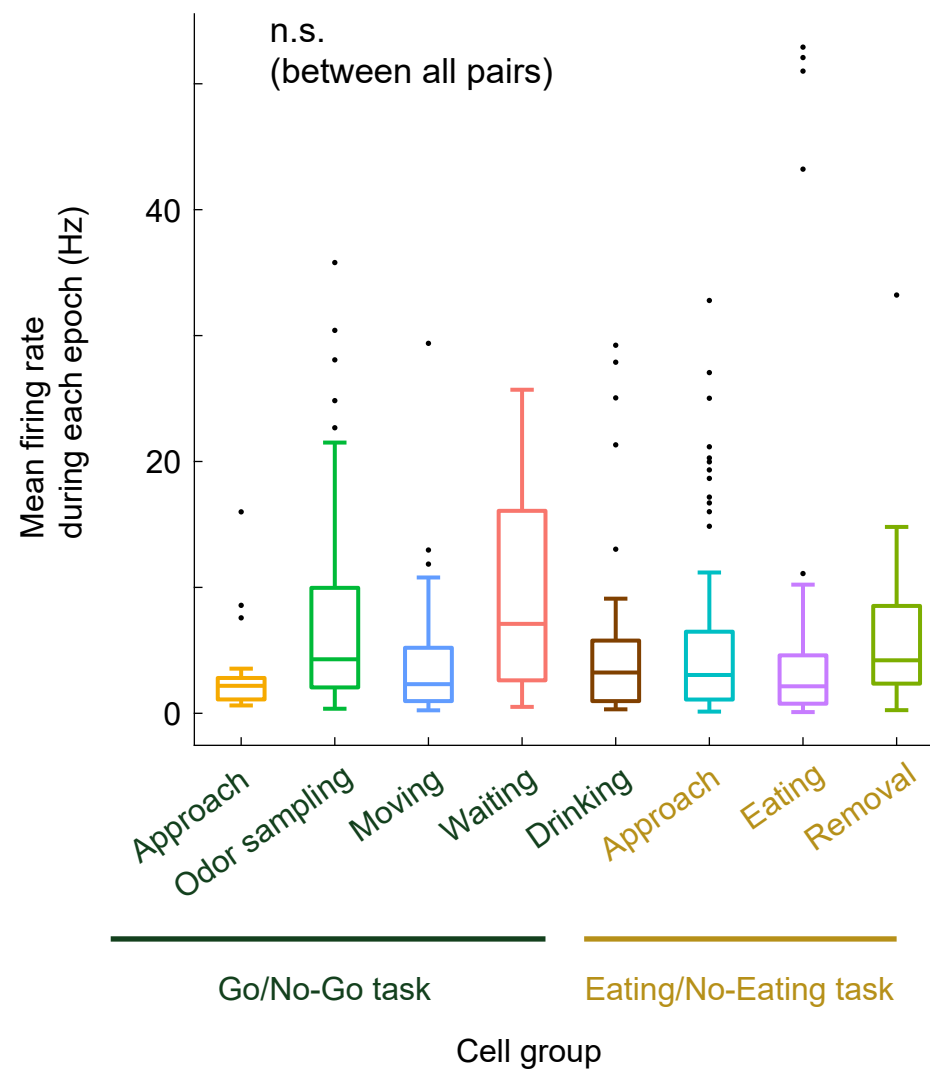

**Figure 4—figure supplement 1**

Supplement: supp [file elife-57268-supp-v1.zip › elife_poa_e57268_Figure_4_figure_supplement_1.pdf]

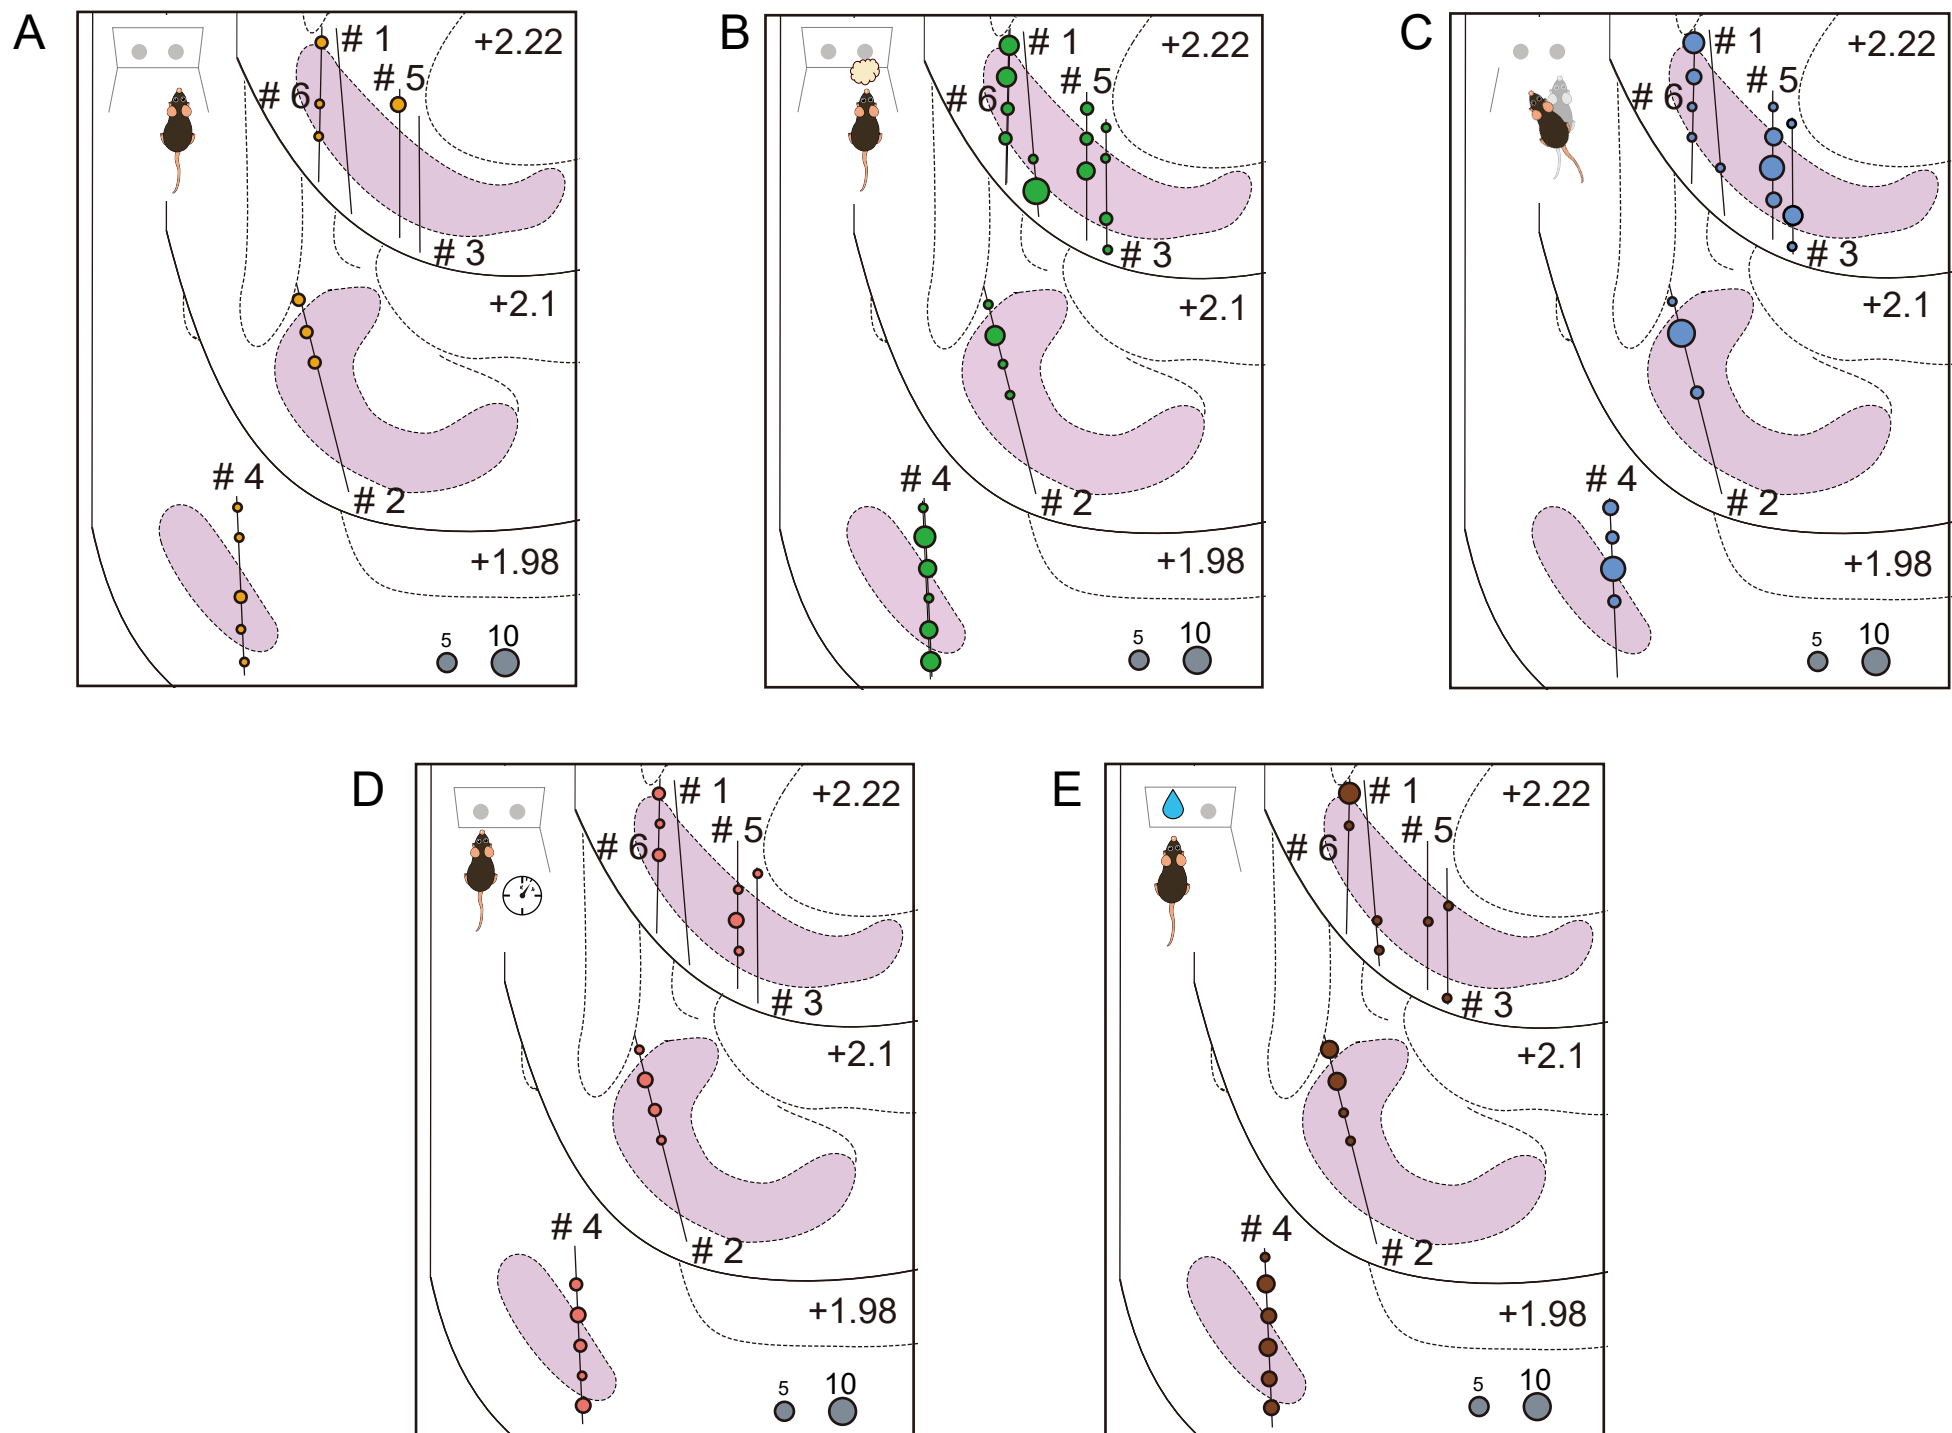

**Figure 4—figure supplement 2**

Supplement: supp [file elife-57268-supp-v1.zip › elife_poa_e57268_Figure_4_figure_supplement_2.pdf]

A

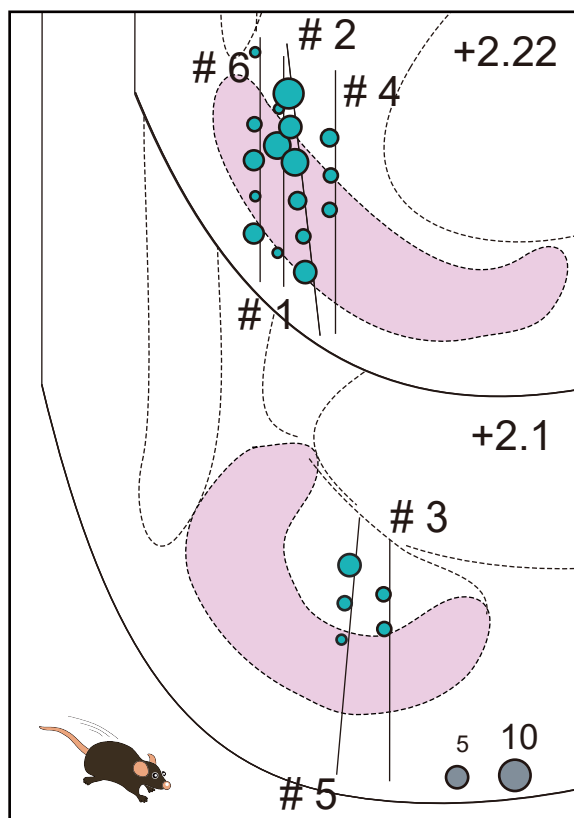

B

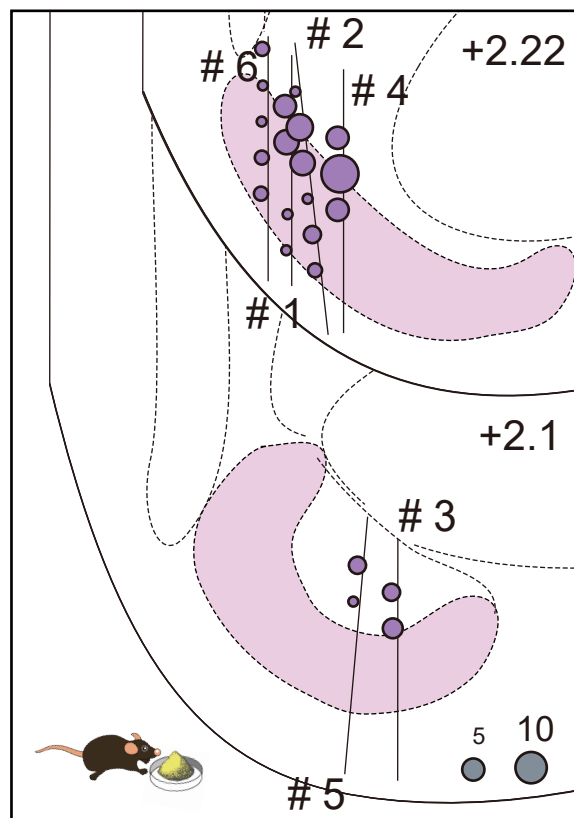

C

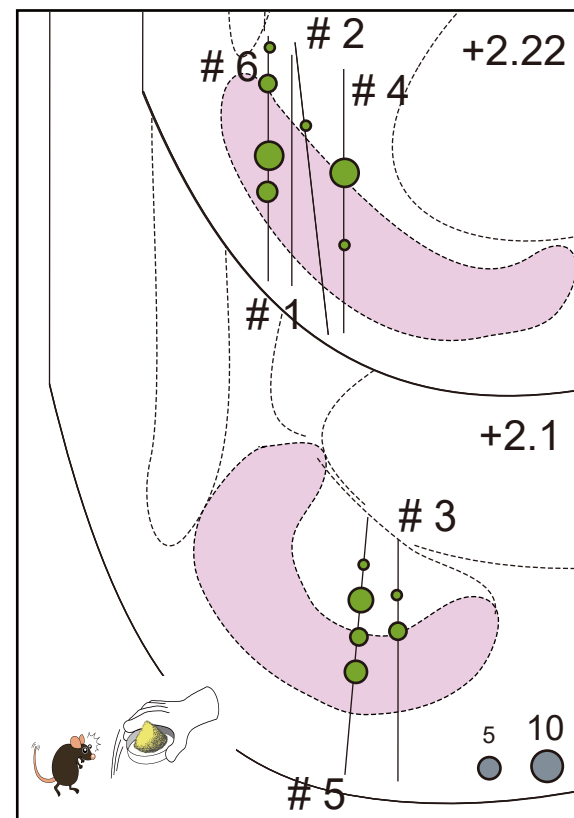

**Figure 4—figure supplement 3**

Supplement: supp [file elife-57268-supp-v1.zip › elife_poa_e57268_Figure_4_figure_supplement_3.pdf]

A

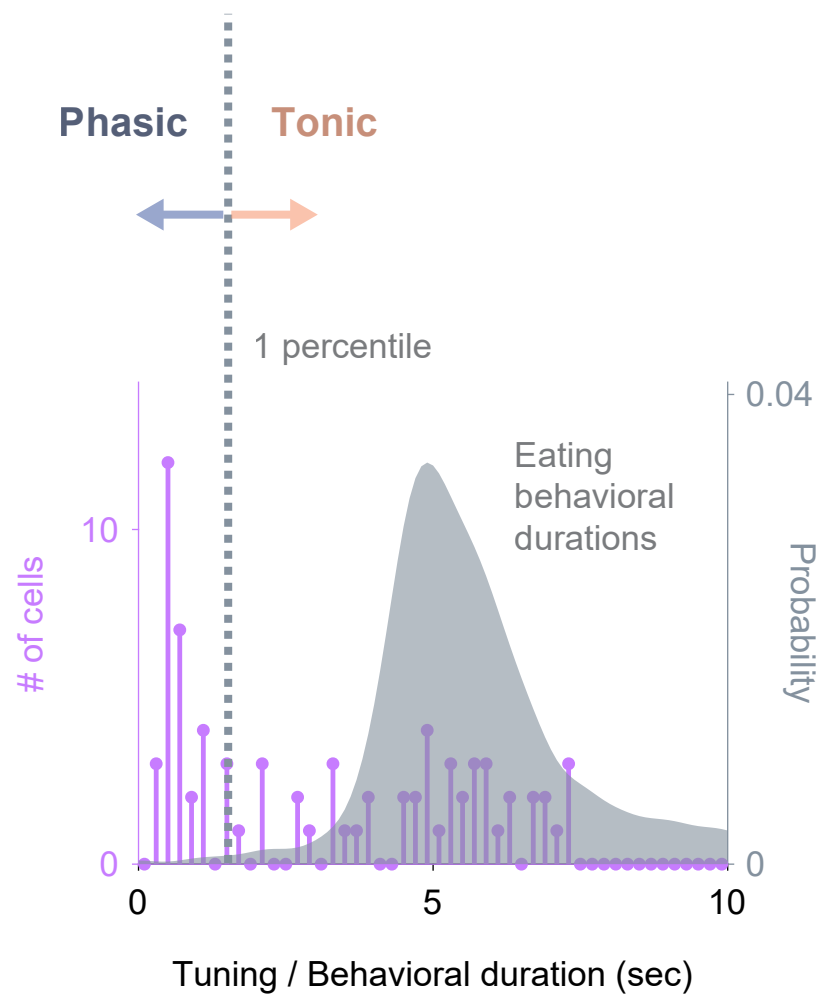

B

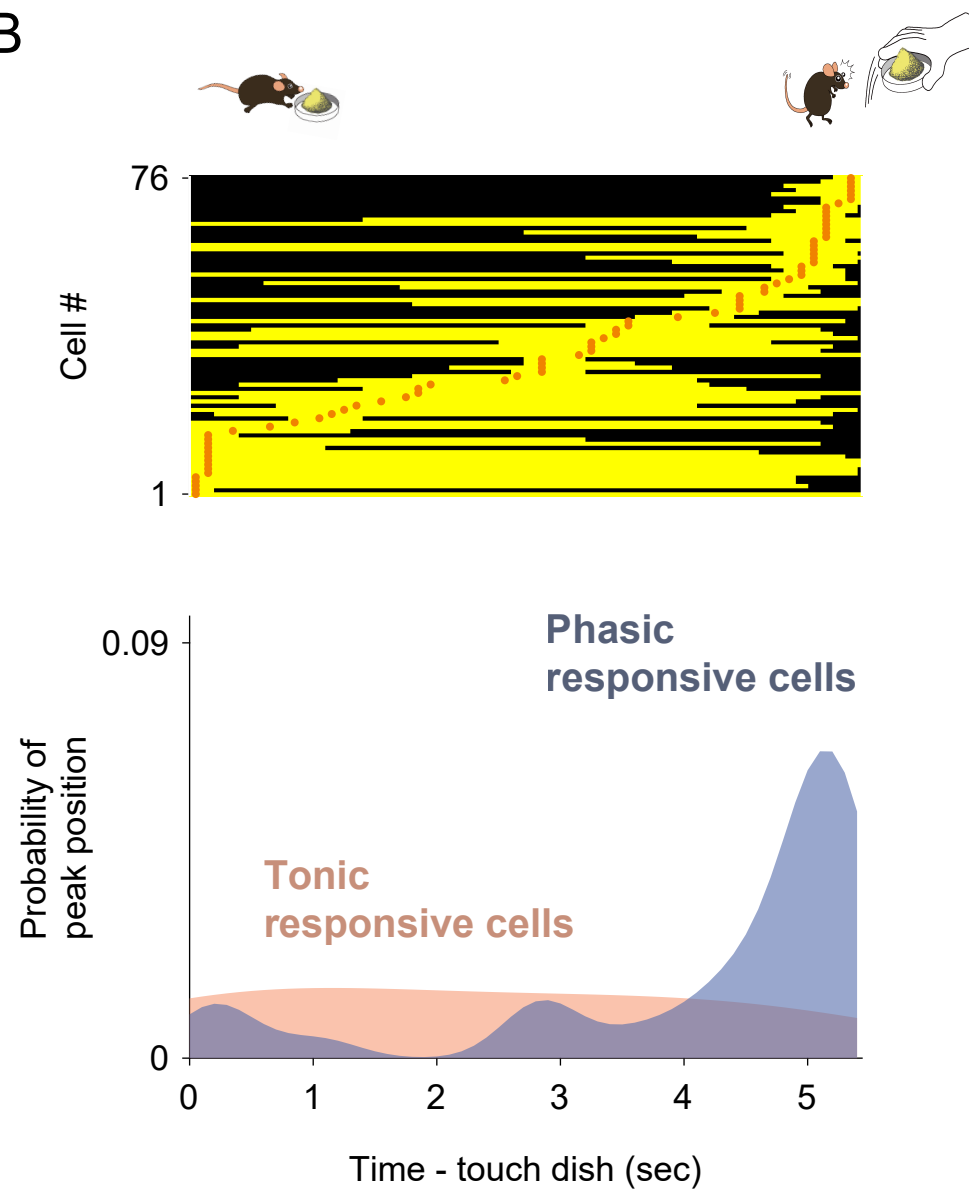

**Figure 4—figure supplement 4**

Supplement: supp [file elife-57268-supp-v1.zip › elife_poa_e57268_Figure_4_figure_supplement_4.pdf]
